# Supplementary material for: Impaired GAPDH-induced mitophagy contributes to the pathology of Huntington’s disease
Source: PubMed Central journal article supplement (PMC4604685; doi:10.15252/emmm.201505256), 2015-08-12

Figure 2

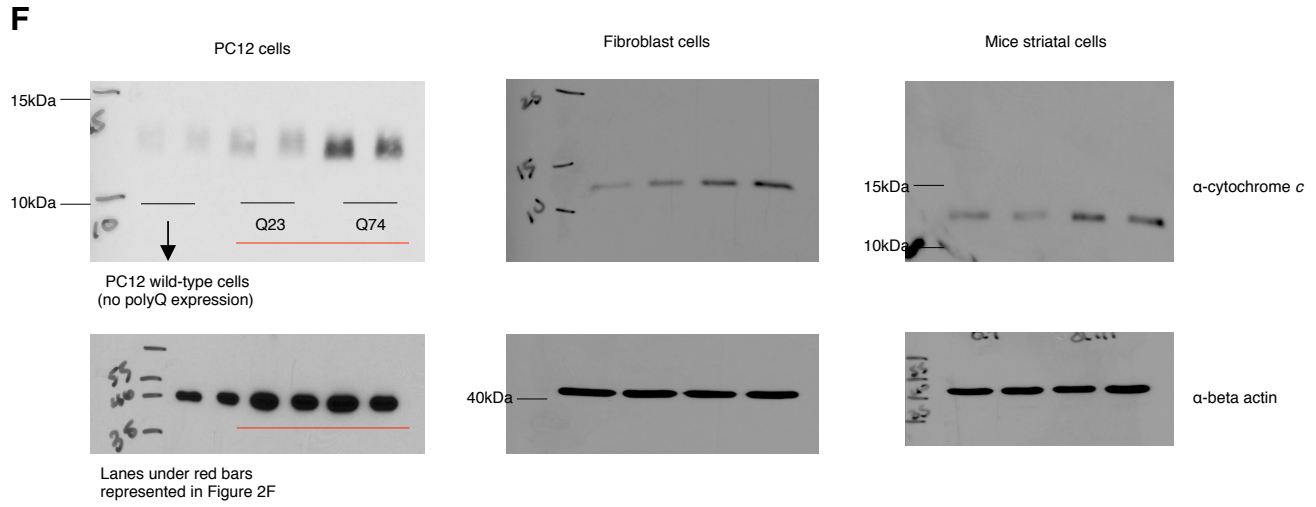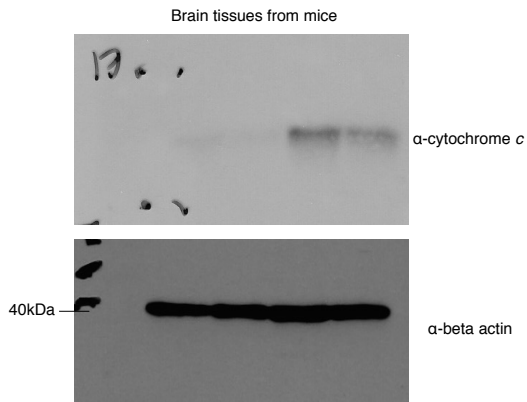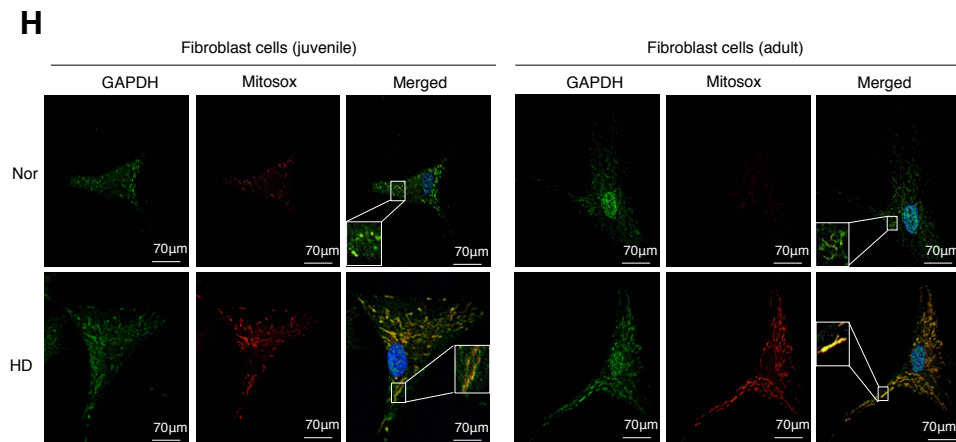

Supplement: emmm0007-1307-sd4.pdf [file emmm0007-1307-sd4.pdf]
