# Supplementary material for: Impaired GAPDH-induced mitophagy contributes to the pathology of Huntington’s disease
Source: PubMed Central journal article supplement (PMC4604685; doi:10.15252/emmm.201505256), 2015-08-12
Supplement: emmm0007-1307-sd5.pdf [file emmm0007-1307-sd5.pdf]

Figure 3

A

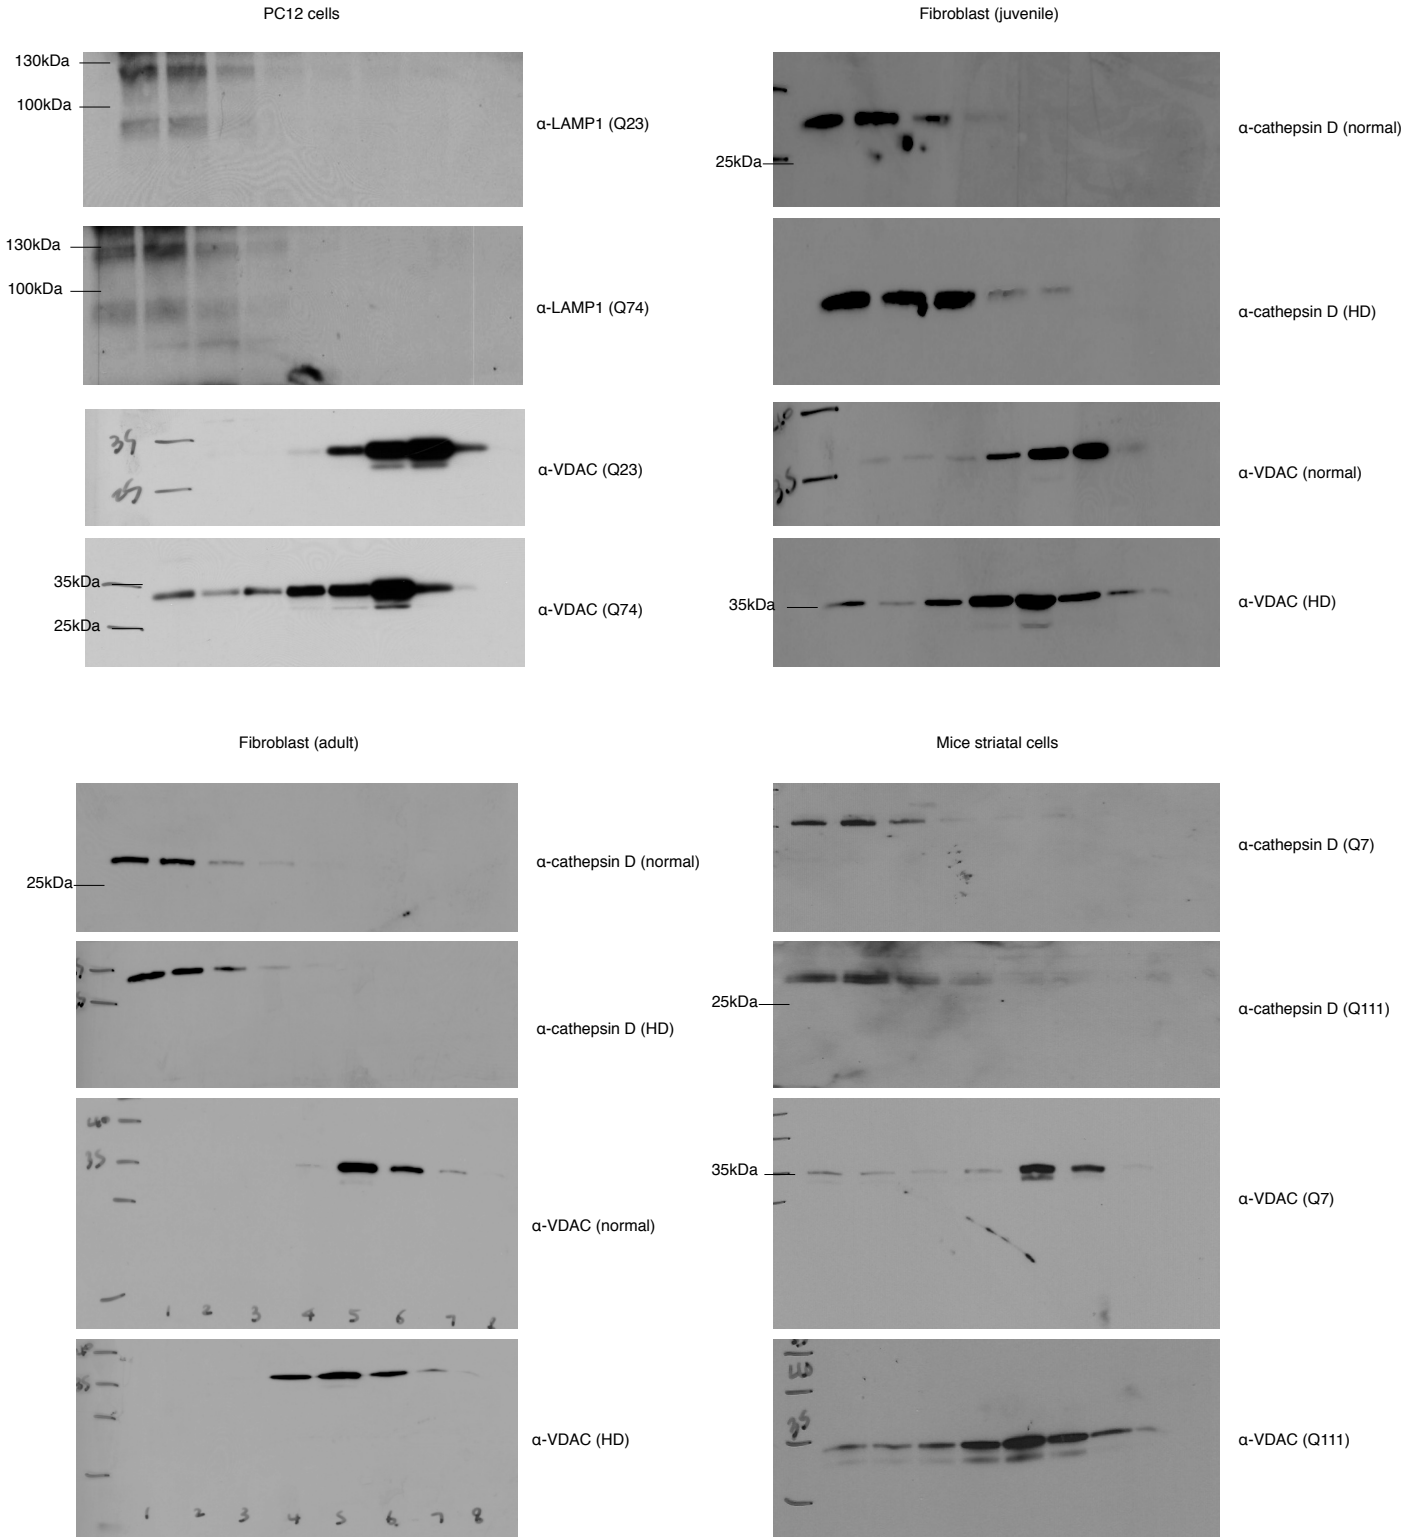

Figure 3

D

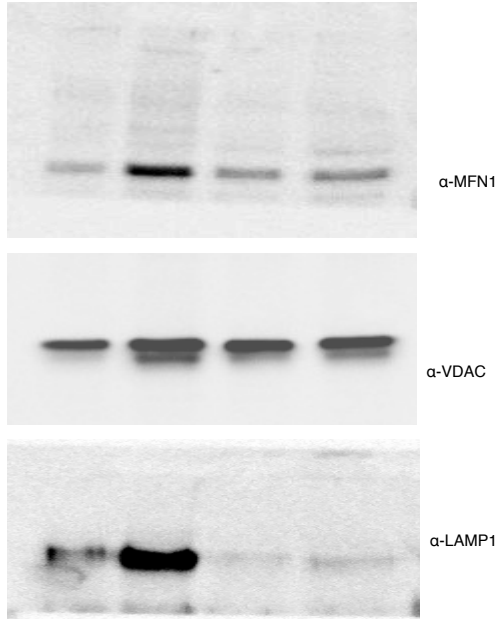

E

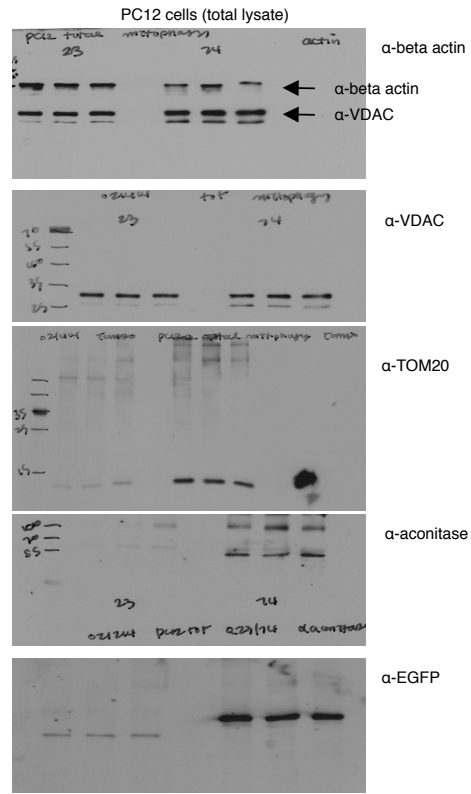

F

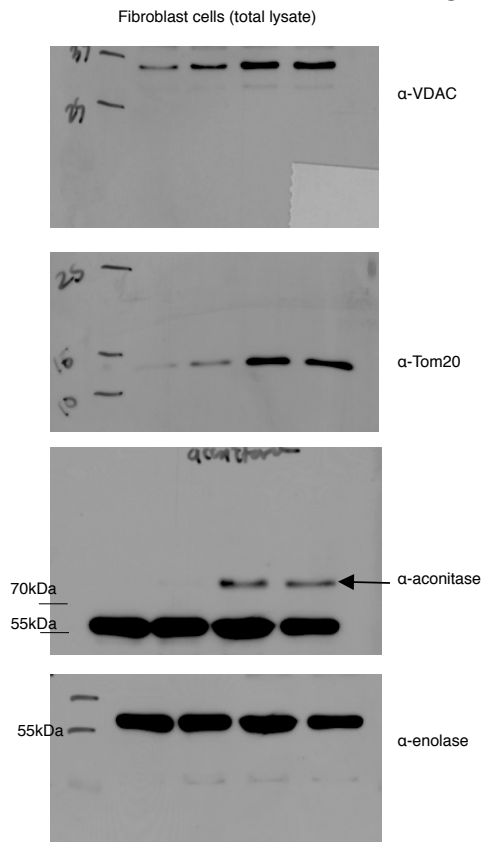

G

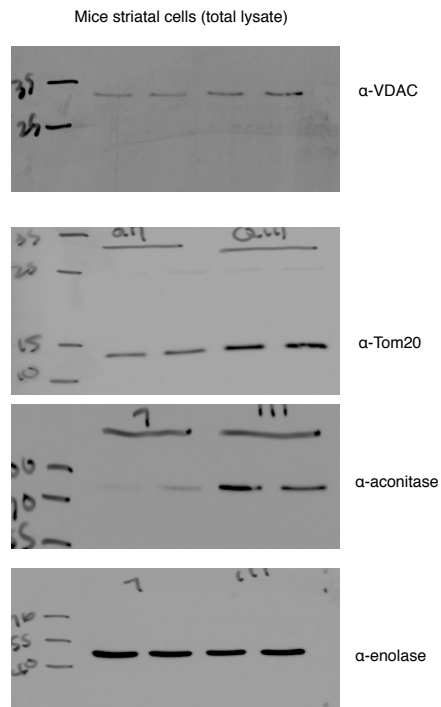

H

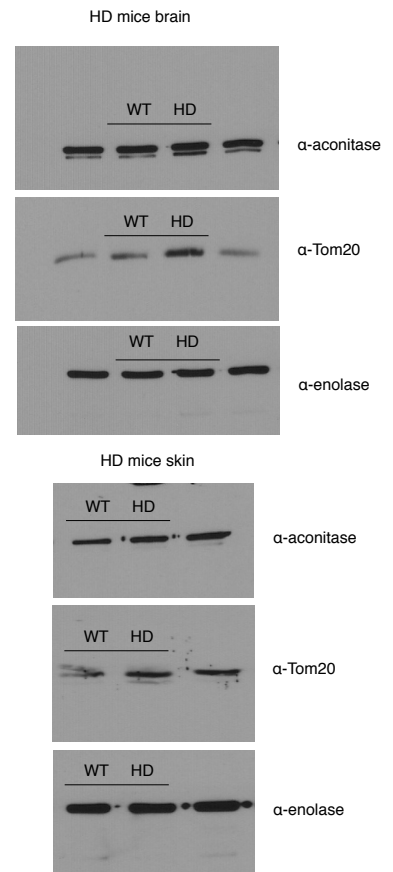

Lanes under bars represented in Figure 3H
